# Supplementary material for: Evaluating the Utility of Polygenic Risk Scores in Identifying High-Risk Individuals for Eight Common Cancers
Source: Oxford University Press journal article supplement (doi:10.1093/jncics/pkaa021), 2020-03-06
Supplement: pkaa021_supplementary_data.xlsx [file pkaa021_supplementary_data.xlsx]

## Sheet: Table S1
Table S1. Selected GWAS-identified SNPs for PRS of each cancer
Cancer	Locus	SNP	Chr	Position (hg19)	Risk allele	RAF	Weight (beta)	P-value	Note	Pubmed_ID
Bladder	3q26.2	rs10936599	3	169492101	C	0.7576	0.162519	4.53e-09		24163127
Bladder	3q28	rs710521	3	189645933	T	0.7274	0.131028	1.92e-11		24163127
Bladder	4p16.3	rs798766	4	1734239	T	0.194	0.198851	7.06e-25		24163127
Bladder	5p15.33	rs401681	5	1322087	C	0.5637	0.113329	4.27e-11		24163127
Bladder	8p22	rs1495741	8	18272881	A	0.7744	0.131028	1.77e-10		24163127
Bladder	8q24.21	rs9642880	8	128718068	T	0.4567	0.215111	3.55e-38		24163127
Bladder	8q24.3	rs2294008	8	143761931	T	0.4407	0.122218	2.75e-15		24163127
Bladder	11p15.5	rs907611	11	1874072	A	0.3086	0.139762	4.11e-08		24163127
Bladder	13q34	rs4907479	13	113659108	A	0.2498	0.0676586	3.3e-10		26732427
Bladder	18q12.3	rs17674580	18	43309911	T	0.3534	0.157004	7.6e-11		21750109
Bladder	19q12	rs8102137	19	30296853	C	0.3203	0.122218	1.22e-11		24163127
Bladder	20p12.2	rs6104690	20	10988099	A	0.5605	0.127833	2.19e-11		26732427
Bladder	20p12.2	rs4813953	20	10991138	T	0.384	0.14842	2.1e-10		24861552
Bladder	22q13.1	rs1014971	22	39332623	T	0.6258	0.122218	9.76e-12		24163127
Breast	1p36.23	rs707475	1	7917076	C	0.648513	0.0399			30554720
Breast	1p36.22	rs616488	1	10566215	C	0.401747	0.0548			30554720
Breast	1p36.13	rs2992756	1	18807339	A	0.2302	0.0499			30554720
Breast	1p34.2	rs4233486	1	41380440	T	0.0559366	0.0917			30554720
Breast	1p34.2	rs114282204	1	41389220	C	0.600818	0.0065			30554720
Breast	1p34.1	rs144105764	1	46670206	A	0.271472	0.0498			30554720
Breast	1p32.3	rs56168262	1	51467096	G	0.666347	0.0366			30554720
Breast	1p22.3	rs17426269	1	88156923	G	0.327999	0.0417			30554720
Breast	1p22.2	rs2151842	1	88428199	G	0.789347	0.044			30554720
Breast	1p21.2	rs612683	1	100880328	T	0.241509	0.0418			30554720
Breast	1p13.3	rs143851671	1	110198129	G	0.0305037	0.1428			30554720
Breast	1p13.2	rs7513707	1	114445880	C	0.116007	0.0603			30554720
Breast	1p12	rs12406858	1	118141492	T	0.440093	0.0331			30554720
Breast	1p12	rs637868	1	120257110	A	0.591841	0.0427			30554720
Breast	1p11.2	rs11249433	1	121280613	G	0.771261	0.0066			30554720
Breast	1p11.2	rs111458676	1	121287994	T	0.737834	0.0427			30554720
Breast	1q21.1	rs143384623	1	145604302	C	0.53414	0.0402			30554720
Breast	1q21.2	rs11205303	1	149906413	G	0.721287	0.0412			30554720
Breast	1q22	rs12091730	1	155556971	C	0.30805	0.0473			30554720
Breast	1q32.1	rs35383942	1	201437832	A	0.295306	0.0334			30554720
Breast	1q32.1	rs6686987	1	202184600	T	0.805702	0.0427			30554720
Breast	1q32.1	rs7514172	1	203770448	G	0.647251	0.044			30554720
Breast	1q32.2	rs2785646	1	208076291	C	0.896981	0.0992			30554720
Breast	1q41	rs2576261	1	217053815	C	0.525728	0.0473			30554720
Breast	1q41	rs11117758	1	217220574	G	0.844995	0.0593			30554720
Breast	1q41	rs11118563	1	220671050	T	0.858832	0.0316			30554720
Breast	1q43	rs72755295	1	242034263	T	0.279015	0.0492			30554720
Breast	2p25.1	rs78425380	2	10138983	G	0.499912	0.1318			30554720
Breast	2p24.1	rs6743383	2	19315675	GA	0.961834	0.2016			30554720
Breast	2p23.3	rs6725517	2	25129473	G	0.608286	0.0431			30554720
Breast	2p23.2	rs12472404	2	29179452	C	0.022789	0.1232			30554720
Breast	2p23.2	rs4322799	2	29615233	G	0.380157	0.0616			30554720
Breast	2p22.1	rs553796823	2	39699510	A	0.525924	0.0748			30554720
Breast	2p13.3	rs6756513	2	70172587	G	0.273463	0.0502			30554720
Breast	2p11.2	rs1036759	2	88358825	C	0.98374	0.1281			30554720
Breast	2q14.2	rs6746250	2	121058254	T	0.297549	0.0592			30554720
Breast	2q14.2	rs17625845	2	121089731	T	0.896764	0.0806			30554720
Breast	2q14.2	rs10164550	2	121159205	C	0.712718	0.0367			30554720
Breast	2q14.2	rs10179592	2	121246568	A	0.969547	0.1195			30554720
Breast	2q31.1	rs17726078	2	172974566	C	0.570646	0.0394			30554720
Breast	2q31.1	rs1550622	2	174212910	T	0.361796	0.0374			30554720
Breast	2q32.3	rs2356656	2	192381934	A	0.907923	0.0723			30554720
Breast	2q33.1	rs10197246	2	202204741	G	0.514798	0.0376			30554720
Breast	2q35	rs4442975	2	217920769	C	0.414934	0.0551			30554720
Breast	2q35	rs572022984	2	217955896	A	0.213144	0.0422			30554720
Breast	2q35	rs3791977	2	218714845	C	0.776539	0.0478			30554720
Breast	2q37.3	rs4676356	2	241388857	T	0.249283	0.0489			30554720
Breast	3p26.1	rs6762558	3	4742251	A	0.439526	0.0352			30554720
Breast	3p24.1	rs552647	3	27353716	T	0.228925	0.0471			30554720
Breast	3p24.1	rs62255657	3	27388664	C	0.88854	0.0569			30554720
Breast	3p24.1	rs112476261	3	29294845	G	0.883911	0.0898			30554720
Breast	3p24.1	rs17838698	3	30684907	A	0.343344	0.0348			30554720
Breast	3p21.31	rs56387622	3	46888198	C	0.0543993	0.084			30554720
Breast	3p21.31	rs371314787	3	49709912	T	0.259193	0.0617			30554720
Breast	3p14.3	rs138866686	3	55970777	C	0.0121465	0.1552			30554720
Breast	3p14.2	rs2886671	3	59373745	A	0.413865	0.0391			30554720
Breast	3p13	rs9825432	3	71620370	G	0.440604	0.0426			30554720
Breast	3p12.1	rs13066793	3	87037543	A	0.845085	0.1101			30554720
Breast	3p12.1	rs639355	3	99403877	T	0.601044	0.0492			30554720
Breast	3q23	rs376397524	3	141112859	G	0.248118	0.0497			30554720
Breast	3q26.31	rs58058861	3	172285237	G	0.691896	0.0336			30554720
Breast	3q28	rs9882792	3	189774456	C	0.636869	0.0458			30554720
Breast	4p14	rs10012017	4	38784633	T	0.557607	0.0394			30554720
Breast	4q22.1	rs17014016	4	89240476	G	0.158336	0.1366			30554720
Breast	4q24	rs62331150	4	106069013	T	0.0520514	0.0865			30554720
Breast	4q31.21	rs56039025	4	143467195	T	0.834519	0.0564			30554720
Breast	4q34.1	rs28436676	4	175842495	C	0.425025	0.0434			30554720
Breast	4q34.1	rs62334414	4	175847436	G	0.742773	0.041			30554720
Breast	5p15.33	rs62641919	5	345109	T	0.678737	0.0363			30554720
Breast	5p15.33	rs10069690	5	1279790	GA	0.175485	0.0328			30554720
Breast	5p15.33	rs62329727	5	1353077	TA	0.749681	0.0598			30554720
Breast	5p15.33	rs4866496	5	2777029	G	0.841958	0.0564			30554720
Breast	5p15.1	rs17611291	5	16231194	G	0.819011	0.0487			30554720
Breast	5p12	rs187108781	5	44619502	C	0.255232	0.0386			30554720
Breast	5p12	rs4613718	5	44649944	T	0.0306047	0.0944			30554720
Breast	5p12	rs10941679	5	44706498	G	0.542693	0.0392			30554720
Breast	5p12	rs17343002	5	44853593	C	0.755029	0.0388			30554720
Breast	5q11.2	rs553874618	5	55662540	C	0.431652	0.0677			30554720
Breast	5q11.2	rs889310	5	55965167	C	0.334458	0.0412			30554720
Breast	5q11.2	rs16886165	5	56023083	A	0.407449	0.0365			30554720
Breast	5q11.2	rs76250845	5	56042972	C	0.542245	0.0363			30554720
Breast	5q11.2	rs11949391	5	56045081	G	0.430948	0.0553			30554720
Breast	5q11.2	rs113778879	5	58241712	C	0.670051	0.0373			30554720
Breast	5q13.2	rs3010266	5	71965007	A	0.620023	0.0326			30554720
Breast	5q13.2	rs157557	5	73234583	T	0.569657	0.0321			30554720
Breast	5q14.1	rs34525310	5	79180995	G	0.918508	0.0737			30554720
Breast	5q14.2	rs146817970	5	81512947	G	0.90154	0.064			30554720
Breast	5q14.3	rs332529	5	90789470	C	0.0603855	0.0762			30554720
Breast	5q21.2	rs17157372	5	104300273	C	0.277033	0.0383			30554720
Breast	5q23.2	rs335160	5	122478676	CT	0.711606	0.0472			30554720
Breast	5q23.2	rs1428387	5	122705244	T	0.793877	0.0476			30554720
Breast	5q31.1	rs6860806	5	131640536	C	0.30833	0.0703			30554720
Breast	5q31.1	rs6596100	5	132407058	G	0.0713254	0.1449			30554720
Breast	5q33.3	rs1432679	5	158244083	C	0.611864	0.0137			30554720
Breast	5q35.1	rs10074269	5	169591460	A	0.39649	0.0626			30554720
Breast	5q35.2	rs6864691	5	173358154	T	0.0626561	0.074			30554720
Breast	5q35.2	rs4868701	5	176134882	T	0.514554	0.0649			30554720
Breast	6p23	rs418053	6	13713366	C	0.47985	0.0308			30554720
Breast	6p22.3	rs3819405	6	16399557	C	0.615803	0.0373			30554720
Breast	6p22.3	rs12211970	6	18783140	A	0.648527	0.0467			30554720
Breast	6p22.3	rs9358466	6	21923810	C	0.833255	0.0486			30554720
Breast	6p22.1	rs34196306	6	27425644	G	0.892828	0.0572			30554720
Breast	6p21.1	rs111342015	6	43227141	A	0.450274	0.0349			30554720
Breast	6q14.3	rs146519950	6	85912194	C	0.279207	0.0449			30554720
Breast	6q14.3	rs73754909	6	87803819	G	0.83733	0.0467			30554720
Breast	6q23.1	rs55941023	6	130341728	G	0.210941	0.042			30554720
Breast	6q25.1	rs2121348	6	149595505	G	0.874454	0.0568			30554720
Breast	6q25.1	rs6913578	6	151949806	C	0.341616	0.0418			30554720
Breast	6q25.1	rs60954078	6	151955914	C	0.626592	0.0476			30554720
Breast	6q25.1	rs57589542	6	152022664	A	0.297097	0.0416			30554720
Breast	6q25.1	rs851984	6	152023191	G	0.771601	0.0563			30554720
Breast	6q25.1	rs6904031	6	152055978	C	0.222716	0.0477			30554720
Breast	6q25.1	rs910416	6	152432902	CT	0.376997	0.0377			30554720
Breast	6q27	rs9364472	6	169006947	A	0.351334	0.0389			30554720
Breast	6q27	rs6940159	6	170332621	A	0.403204	0.0335			30554720
Breast	7p15.3	rs7971	7	21940960	A	0.324368	0.0601			30554720
Breast	7p15.2	rs289997	7	25569548	A	0.81797	0.076			30554720
Breast	7p14.3	rs74765302	7	28869017	G	0.828166	0.0755			30554720
Breast	7p11.2	rs13244925	7	55192256	T	0.0878064	0.1129			30554720
Breast	7q21.3	rs17268829	7	94113799	G	0.6405	0.0391			30554720
Breast	7q22.1	rs4439053	7	98005235	C	0.0966816	0.0593			30554720
Breast	7q22.1	rs111963714	7	99948655	A	0.899669	0.0745			30554720
Breast	7q22.1	rs71559437	7	101552440	A	0.35551	0.0417			30554720
Breast	7q22.1	rs7800548	7	102481842	G	0.131792	0.0527			30554720
Breast	7q32.3	rs12706954	7	130656911	C	0.145791	0.0477			30554720
Breast	7q32.3	rs68056147	7	130674481	A	0.417312	0.034			30554720
Breast	7q35	rs62485509	7	144048902	G	0.398483	0.0466			30554720
Breast	8p23.3	rs66823261	8	170692	G	0.402038	0.0642			30554720
Breast	8p22	rs527298592	8	17787610	G	0.544568	0.0597			30554720
Breast	8p21.2	rs1028016	8	23447496	A	0.171721	0.0615			30554720
Breast	8p21.2	rs310295	8	23663653	A	0.661	0.0346			30554720
Breast	8p12	rs9693444	8	29509616	G	0.285481	0.0348			30554720
Breast	8p11.23	rs13365225	8	36858483	G	0.139321	0.0289			30554720
Breast	8q21.11	rs1511243	8	76230943	C	0.534878	0.0249			30554720
Breast	8q21.11	rs72658084	8	76333056	C	0.509365	0.0361			30554720
Breast	8q21.11	rs1533366	8	76378165	C	0.0940217	0.0576			30554720
Breast	8q22.3	rs62517052	8	102483100	T	0.206527	0.0797			30554720
Breast	8q23.1	rs12546444	8	106358620	G	0.0630024	0.1158			30554720
Breast	8q23.3	rs13267382	8	117209548	T	0.174994	0.0653			30554720
Breast	8q24.12	rs62526620	8	120862186	T	0.597673	0.0153			30554720
Breast	8q24.13	rs35542655	8	124563705	T	0.622202	0.0877			30554720
Breast	8q24.13	rs12541094	8	124571581	A	0.591274	0.0462			30554720
Breast	8q24.13	rs7842619	8	124739913	A	0.542257	0.0382			30554720
Breast	8q24.21	rs12550713	8	128370949	T	0.27274	0.04			30554720
Breast	8q24.21	rs10096351	8	128372172	G	0.213664	0.047			30554720
Breast	8q24.21	rs1016578	8	129199566	A	0.437646	0.0371			30554720
Breast	8q24.3	rs7830152	8	143669254	A	0.291456	0.058			30554720
Breast	9p24.1	rs10975870	9	6880263	C	0.936979	0.0875			30554720
Breast	9p21.3	rs17694493	9	22041998	A	0.369776	0.0404			30554720
Breast	9p13.2	rs4880038	9	36928288	A	0.839745	0.1345			30554720
Breast	9q21.33	rs665889	9	87782211	T	0.195798	0.0472			30554720
Breast	9q22.32	rs10120432	9	98362587	C	0.682131	0.0404			30554720
Breast	9q31.2	rs60037937	9	110303808	G	0.382791	0.0805			30554720
Breast	9q31.2	rs10816625	9	110837073	G	0.163132	0.0762			30554720
Breast	9q31.2	rs13294895	9	110837176	CAA	0.176639	0.0512			30554720
Breast	9q31.2	rs7848334	9	110849525	T	0.463148	0.0472			30554720
Breast	9q31.2	rs630965	9	110885479	T	0.215423	0.0592			30554720
Breast	9q33.1	rs1895062	9	119313486	G	0.673084	0.0538			30554720
Breast	9q33.3	rs3861871	9	129424719	G	0.065632	0.1508			30554720
Breast	9q34.2	rs550057	9	136146597	GC	0.40374	0.2408			30554720
Breast	10p15.1	rs55910451	10	5794652	A	0.951561	0.2609			30554720
Breast	10p13	rs10796139	10	13892298	T	0.20306	0.0437			30554720
Breast	10p12.31	rs7072776	10	22032942	G	0.516722	0.0457			30554720
Breast	10p12.2	rs10764337	10	22861490	C	0.607589	0.0762			30554720
Breast	10p11.1	rs2384736	10	38523626	G	0.729325	0.0461			30554720
Breast	10q21.2	rs10995201	10	64299890	C	0.672095	0.0336			30554720
Breast	10q21.3	rs6479868	10	64819996	A	0.549522	0.0374			30554720
Breast	10q22.1	rs111833376	10	71335574	C	0.934143	0.0748			30554720
Breast	10q22.3	rs719338	10	80851257	A	0.186722	0.0425			30554720
Breast	10q22.3	rs4980029	10	80886726	G	0.511425	0.0347			30554720
Breast	10q23.33	rs59954380	10	95292187	A	0.786964	0.0423			30554720
Breast	10q25.2	rs10885405	10	114777670	A	0.125009	0.1022			30554720
Breast	10q25.3	rs12250948	10	115128491	T	0.0752919	0.1782			30554720
Breast	10q26.12	rs9421410	10	123095209	G	0.657162	0.0147			30554720
Breast	10q26.13	rs45631580	10	123340107	C	0.582674	0.0022			30554720
Breast	10q26.13	rs397897588	10	123340431	T	0.377866	0.0396			30554720
Breast	10q26.13	rs45631563	10	123349324	A	0.795423	0.0423			30554720
Breast	11p15.5	rs7394715	11	433617	A	0.707767	0.0383			30554720
Breast	11p15.5	rs6597981	11	803017	T	0.13803	0.0543			30554720
Breast	11p15.5	rs4980386	11	1895708	G	0.601574	0.0453			30554720
Breast	11p15.1	rs10832963	11	18664241	G	0.371135	0.0401			30554720
Breast	11p12	rs4472923	11	42844441	C	0.261886	0.0484			30554720
Breast	11p11.2	rs10838267	11	44368892	C	0.882997	0.062			30554720
Breast	11p11.2	rs77047825	11	46318032	C	0.757867	0.0856			30554720
Breast	11q13.1	rs12287832	11	65553492	C	0.784693	0.0521			30554720
Breast	11q13.1	rs10896047	11	65572431	A	0.912578	0.0647			30554720
Breast	11q13.3	rs35039974	11	69328130	T	0.896313	0.0579			30554720
Breast	11q13.3	rs661204	11	69330983	T	0.180957	0.0469			30554720
Breast	11q13.3	rs78540526	11	69331418	GA	0.0991575	0.0671			30554720
Breast	11q22.3	rs7125780	11	103614438	T	0.495534	0.0348			30554720
Breast	11q22.3	rs199504893	11	108267402	A	0.703728	0.0867			30554720
Breast	11q23.1	rs610437	11	111696440	T	0.117463	0.0546			30554720
Breast	11q23.3	rs625145	11	116727936	G	0.628452	0.0442			30554720
Breast	11q24.1	rs7121616	11	122966626	C	0.261522	0.0465			30554720
Breast	11q24.3	rs7939702	11	129243417	A	0.804125	0.0428			30554720
Breast	11q24.3	rs11822830	11	129461016	T	0.582912	0.0813			30554720
Breast	12p13.33	rs797736	12	293626	T	0.15925	0.0516			30554720
Breast	12p13.1	rs12422552	12	14413931	A	0.017404	0.0424			30554720
Breast	12p11.22	rs788458	12	28149568	T	0.0079011	0.2687			30554720
Breast	12p11.22	rs7297051	12	28174817	G	0.830284	0.0517			30554720
Breast	12p11.22	rs11049431	12	28347382	C	0.315317	0.0345			30554720
Breast	12p11.22	rs1027113	12	29140260	G	0.761778	0.0399			30554720
Breast	12q13.3	rs2277339	12	57146069	C	0.787771	0.0733			30554720
Breast	12q15	rs2870876	12	70798355	T	0.443449	0.039			30554720
Breast	12q21.31	rs111622698	12	83064195	T	0.16554	0.0474			30554720
Breast	12q21.31	rs10862899	12	85004551	T	0.741917	0.0911			30554720
Breast	12q22	rs17356907	12	96027759	T	0.69339	0.038			30554720
Breast	12q23.2	rs7132703	12	103097887	G	0.344356	0.0513			30554720
Breast	12q24.11	rs11065822	12	111600134	C	0.829114	0.0577			30554720
Breast	12q24.21	rs1061657	12	115108136	G	0.45883	0.0399			30554720
Breast	12q24.21	rs11067551	12	115796577	C	0.988452	0.1973			30554720
Breast	12q24.21	rs2454399	12	115835836	A	0.655402	0.0417			30554720
Breast	12q24.31	rs206966	12	120832146	G	0.358725	0.0369			30554720
Breast	13q13.1	rs56404467	13	32839990	G	0.0496177	0.0782			30554720
Breast	13q13.1	rs11571833	13	32972626	T	0.739566	0.0413			30554720
Breast	13q14.11	rs9315973	13	43501356	G	0.864669	0.0589			30554720
Breast	13q22.1	rs12870942	13	73806982	A	0.889986	0.0608			30554720
Breast	13q22.1	rs2181965	13	73960952	CAAAAA	0.178704	0.0329			30554720
Breast	14q13.3	rs34914085	14	37128564	C	0.73571	0.03			30554720
Breast	14q13.3	rs2253012	14	37228504	G	0.783475	0.0354			30554720
Breast	14q24.1	rs2588809	14	68660428	G	0.930519	0.074			30554720
Breast	14q24.1	rs11624333	14	68979835	T	0.0236359	0.1218			30554720
Breast	14q32.11	rs11341843	14	91751788	A	0.25617	0.1147			30554720
Breast	14q32.11	rs941764	14	91841069	T	0.24063	0.107			30554720
Breast	14q32.12	rs78440108	14	93070286	C	0.579915	0.0704			30554720
Breast	14q32.33	rs4983544	14	105213978	C	0.239588	0.0338			30554720
Breast	15q21.1	rs187010898	15	46680811	G	0.633683	0.0337			30554720
Breast	15q21.2	rs4774565	15	50694306	A	0.485033	0.0477			30554720
Breast	15q22.31	rs8042593	15	66630569	G	0.230292	0.0839			30554720
Breast	15q22.33	rs35874463	15	67457698	T	0.514408	0.0211			30554720
Breast	15q24.2	rs8035987	15	75750383	T	0.741441	0.0469			30554720
Breast	15q26.1	rs2290202	15	91512267	G	0.738677	0.0568			30554720
Breast	15q26.3	rs144767203	15	100905819	C	0.0681914	0.0799			30554720
Breast	16p13.3	rs57920543	16	4008542	C	0.0569783	0.0174			30554720
Breast	16p13.3	rs11076805	16	4106788	G	0.912594	0.0571			30554720
Breast	16p13.3	rs12709163	16	6963972	A	0.0123684	0.2017			30554720
Breast	16p13.13	rs34872983	16	10706580	A	0.697699	0.0793			30554720
Breast	16p12.2	rs75753503	16	23007047	A	0.496167	0.0401			30554720
Breast	16q12.1	rs35668161	16	52538825	C	0.862055	0.0381			30554720
Breast	16q12.1	rs4784227	16	52599188	C	0.359708	0.0415			30554720
Breast	16q12.2	rs55872725	16	53809123	C	0.421421	0.0346			30554720
Breast	16q12.2	rs6499648	16	53861139	G	0.620462	0.0455			30554720
Breast	16q12.2	rs7184573	16	53861592	AT	0.722725	0.0599			30554720
Breast	16q12.2	rs28539243	16	54682064	G	0.71257	0.0399			30554720
Breast	16q23.2	rs7500067	16	80648296	G	0.952566	0.1058			30554720
Breast	16q24.1	rs9931038	16	85145977	G	0.928319	0.0877			30554720
Breast	16q24.1	rs12449271	16	87086492	T	0.648087	0.0542			30554720
Breast	17q11.2	rs79461387	17	29168077	T	0.0513077	0.0956			30554720
Breast	17q21.2	rs150537328	17	39251123	A	0.29577	0.0378			30554720
Breast	17q21.2	rs11296	17	40127060	C	0.651932	0.0719			30554720
Breast	17q21.2	rs17881320	17	40485239	CGGGCG	0.353715	0.0437			30554720
Breast	17q21.2	rs149370081	17	40744470	C	0.351884	0.0619			30554720
Breast	17q22	rs2787486	17	53209774	T	0.392631	0.036			30554720
Breast	17q25.3	rs745570	17	77781725	C	0.637369	0.0359			30554720
Breast	18p11.21	rs16976596	18	11696613	A	0.0628452	0.076			30554720
Breast	18q11.2	rs11665269	18	20634253	C	0.948341	0.0844			30554720
Breast	18q11.2	rs1111207	18	24125857	G	0.792843	0.0315			30554720
Breast	18q11.2	rs527616	18	24337424	A	0.240047	0.044			30554720
Breast	18q11.2	rs397787799	18	24518050	G	0.173215	0.0646			30554720
Breast	18q12.1	rs8092192	18	25407513	G	0.0873347	0.0595			30554720
Breast	18q12.1	rs72931898	18	29981526	C	0.683267	0.0707			30554720
Breast	18q12.3	rs9954058	18	42411803	A	0.0355463	0.0946			30554720
Breast	18q12.3	rs9952980	18	42888797	C	0.620161	0.0367			30554720
Breast	19p13.2	rs117922601	19	13249921	G	0.00536567	0.1839			30554720
Breast	19p13.11	rs56069439	19	17393925	A	0.0869813	0.0654			30554720
Breast	19p13.11	rs10164323	19	18569492	T	0.0209188	0.1405			30554720
Breast	19p13.11	rs140702307	19	19517054	A	0.015438	0.1716			30554720
Breast	19q13.31	rs56681946	19	44283031	A	0.254083	0.0407			30554720
Breast	19q13.32	rs4399645	19	46166073	C	0.109871	0.1148			30554720
Breast	19q13.42	rs1172821	19	55816678	C	0.885555	0.06			30554720
Breast	20p12.3	rs16991615	20	5948227	G	0.583381	0.0134			30554720
Breast	20p12.2	rs1154723	20	11379842	A	0.111687	0.0736			30554720
Breast	20q12	rs6030585	20	41613706	#VALUE!	#VALUE!	#VALUE!			30554720
Breast	20q13.2	rs13039563	20	52296849	#VALUE!	#VALUE!	#VALUE!			30554720
Breast	21q11.2	rs2822999	21	16364756	#VALUE!	#VALUE!	#VALUE!			30554720
Breast	21q21.1	rs2823130	21	16566350	#VALUE!	#VALUE!	#VALUE!			30554720
Breast	21q21.1	rs2403907	21	16574455	#VALUE!	#VALUE!	#VALUE!			30554720
Breast	21q22.3	rs4818836	21	47762932	#VALUE!	#VALUE!	#VALUE!			30554720
Breast	22q11.21	rs9798754	22	19766137	#VALUE!	#VALUE!	#VALUE!			30554720
Breast	22q12.1	rs17879961	22	29121087	#VALUE!	#VALUE!	#VALUE!			30554720
Breast	22q12.1	rs5997390	22	29135543	#VALUE!	#VALUE!	#VALUE!			30554720
Breast	22q12.1	rs34134147	22	29203724	#VALUE!	#VALUE!	#VALUE!			30554720
Breast	22q12.1	rs132289	22	29551872	#VALUE!	#VALUE!	#VALUE!			30554720
Breast	22q13.1	rs5750715	22	39343916	#VALUE!	#VALUE!	#VALUE!			30554720
Breast	22q13.1	rs66987842	22	40904707	#VALUE!	#VALUE!	#VALUE!			30554720
Breast	22q13.2	rs9611990	22	43433100	#VALUE!	#VALUE!	#VALUE!			30554720
Breast	22q13.31	rs112855987	22	45319953	#VALUE!	#VALUE!	#VALUE!			30554720
Breast	22q13.31	rs28512361	22	46283297	#VALUE!	#VALUE!	#VALUE!			30554720
Colorectal	1p32.3	rs12144319	1	55246035	C	0.2548	0.0676586	3.3e-11		29917119
Colorectal	1p34.3	rs4360494	1	38455891	G	0.4539	0.0487902	3.8e-09		29917119
Colorectal	1q25.3	rs10911251	1	183081194	A	0.547	0.0676586	4.93e-08		29917119
Colorectal	1q41	rs6687758	1	222164948	G	0.222	0.0833816	1.47e-08		29917119
Colorectal	2q24.2	rs448513	2	159964552	C	0.326	0.0487902	4.4e-08		29917119
Colorectal	2q32.3	rs11903757	2	192587204	C	0.17	0.0512933	0.00486		29917119
Colorectal	2q33.1	rs983402	2	199781586	T	0.3312	0.0676586	7.7e-12		29917119
Colorectal	2q33.1	rs11884596	2	199612407	C	0.3823	0.0582689	1.1e-09		29917119
Colorectal	2q35	rs992157	2	219154781	A	0.583	0.0676586	1.41e-07		29917119
Colorectal	3p14.1	rs812481	3	66442435	G	0.559	0.0618754	1.11e-06		29917119
Colorectal	3p22.1	rs35360328	3	40924962	A	0.156	0.122218	6.21e-13		29917119
Colorectal	3q13.2	rs72942485	3	112999560	G	0.9802	0.173953	2.1e-08		29917119
Colorectal	3q22.2	rs10049390	3	133701119	A	0.7353	0.0582689	3.8e-09		29917119
Colorectal	3q26.2	rs10936599	3	169492101	C	0.757	0.0304592	0.0257		29917119
Colorectal	4q22.2	rs1370821	4	94943383	T	0.401	0.0676586	4e-08		29917119
Colorectal	4q24	rs1391441	4	106128760	A	0.672	0.0487902	1.6e-08		29917119
Colorectal	4q31.21	rs11727676	4	145659064	C	0.098	0.0861777	2.9e-08		29917119
Colorectal	5p13.1	rs58791712	5	40281805_40281806	GT	0.255	0.0943107	7.3e-14		29917119
Colorectal	5p15.33	rs2735940	5	1296486	G	0.489	0.0833816	3.1e-13		29917119
Colorectal	5p15.33	rs78368589	5	1240204	T	0.0597	0.131028	9.4e-12		29917119
Colorectal	5q21.1	rs145364999	5	98206082	T	0.9969	0.553885	6.3e-09		29917119
Colorectal	5q31.1	rs647161	5	134499092	A	0.66	0.0582689	1.21e-05		29917119
Colorectal	6p12.1	rs62404968	6	55714314	C	0.752	0.0833816	8.6e-10		29917119
Colorectal	6p21.2	rs1321311	6	36622900	A	0.217	0.0487902	0.000363		29917119
Colorectal	6p21.31	rs6906359	6	35528378	C	0.903	0.105361	3.4e-08		29917119
Colorectal	6p21.32	rs9271695	6	32593080	G	0.7954	0.0861777	1.1e-13		29917119
Colorectal	7p13	rs12672022	7	45136423	T	0.8345	0.0676586	2.8e-08		29917119
Colorectal	8q23.3	rs140355816	8	117574515	G	0.012	0.198451	4.97e-06		29917119
Colorectal	8q23.3	rs2450115	8	117624093	T	0.807	0.076961	3.4e-07		29917119
Colorectal	8q23.3	rs16892766	8	117630683	C	0.09	0.198451	3.94e-24		29917119
Colorectal	8q24.21	rs6983267	8	128413305	G	0.499	0.127833	7.74e-27		29917119
Colorectal	8q24.21	rs4313119	8	128571855	G	0.7486	0.0582689	1e-09		29917119
Colorectal	9p21.3	rs1537372	9	22103183	G	0.5692	0.0487902	1.4e-08		29917119
Colorectal	9p24.1	rs719725	9	6365683	A	0.592	0.0392207	0.00045		29917119
Colorectal	9q22.33	rs34405347	9	101679752	T	0.9034	0.0861777	3.1e-08		29917119
Colorectal	9q31.3	rs10980628	9	113671403	C	0.2106	0.0676586	2.8e-09		29917119
Colorectal	10p14	rs11255841	10	8739580	T	0.691	0.0943107	3.16e-12		29917119
Colorectal	10q11.23	rs10994860	10	52645424	C	0.798	0.0833816	3.5e-08		29917119
Colorectal	10q22.3	rs704017	10	80819132	G	0.562	0.0725707	1.96e-08		29917119
Colorectal	10q24.2	rs1035209	10	101345366	T	0.195	0.0861777	1.03e-08		29917119
Colorectal	10q24.32	rs4919687	10	104595248	G	0.702	0.0304592	0.00779		29917119
Colorectal	10q25.2	rs12241008	10	114280702	C	0.1	0.0618754	0.0016		29917119
Colorectal	10q25.2	rs11196172	10	114726843	A	0.119	0.0582689	0.000605		29917119
Colorectal	11q12.2	rs1535	11	61597972	A	0.65	0.0676586	4.15e-08		29917119
Colorectal	11q13.4	rs3824999	11	74345550	G	0.524	0.0725707	3.81e-10		29917119
Colorectal	11q13.4	rs61389091	11	74427921	C	0.9606	0.207014	1.2e-18		29917119
Colorectal	11q22.1	rs2186607	11	101656397	T	0.5178	0.0487902	1.5e-09		29917119
Colorectal	11q23.1	rs3802842	11	111171709	C	0.269	0.116534	5.3e-19		29917119
Colorectal	12p13.31	rs10849432	12	6385727	T	0.903	0.0861777	2.34e-05		29917119
Colorectal	12p13.32	rs10774214	12	4368352	T	0.381	0.0392207	0.000429		29917119
Colorectal	12p13.32	rs3217810	12	4388271	T	0.121	0.139762	1.61e-11		29917119
Colorectal	12p13.32	rs3217874	12	4400808	T	0.4282	0.076961	1.2e-17		29917119
Colorectal	12q12	rs11610543	12	43134191	G	0.5013	0.0487902	1.3e-09		29917119
Colorectal	12q13.12	rs34245511	12	50573433	C	0.362	0.0487902	0.0003		29917119
Colorectal	12q13.12	rs11169552	12	51155663	C	0.75	0.0512933	0.000361		29917119
Colorectal	12q13.3	rs4759277	12	57533690	A	0.3546	0.0487902	9.4e-09		29917119
Colorectal	12q24.12	rs3184504	12	111884608	C	0.536	0.0725707	1.94e-10		29917119
Colorectal	12q24.21	rs59336	12	115116352	T	0.49	0.0512933	1.34e-05		29917119
Colorectal	12q24.21	rs12822984	12	115888504	A	0.495	0.0725707	5e-11	Proxy for rs72013726, r2=0.833	29917119
Colorectal	12q24.22	rs73208120	12	117747590	G	0.084	0.105361	7.59e-07		29917119
Colorectal	13q13.2	rs10161980	13	34093518	C	0.62	0.076961	4.7e-09		29917119
Colorectal	13q13.3	rs7333607	13	37462010	G	0.235	0.076961	6.3e-13		29917119
Colorectal	13q22.1	rs78341008	13	73791554	C	0.0719	0.113329	3.2e-10		29917119
Colorectal	13q34	rs8000189	13	111075881	T	0.6401	0.0582689	1.8e-09		29917119
Colorectal	14q22.2	rs4444235	14	54410919	C	0.493	0.0725707	1.09e-09		29917119
Colorectal	14q22.2	rs1957636	14	54560018	T	0.411	0.0487902	6.42e-05		29917119
Colorectal	14q23.1	rs17094983	14	59189361	G	0.8773	0.0861777	4.6e-11		29917119
Colorectal	15q13.3	rs16969681	15	32993111	T	0.074	0.0953102	1.27e-06		29917119
Colorectal	15q13.3	rs11632715	15	33004247	A	0.461	0.0582689	7.68e-07		29917119
Colorectal	15q13.3	rs73376930	15	33012502	G	0.207	0.127833	3.57e-18		29917119
Colorectal	15q13.3	rs17816465	15	33156386	A	0.2055	0.0676586	6.8e-09		29917119
Colorectal	15q22.33	rs56324967	15	67402824	C	0.6757	0.0676586	1.1e-13		29917119
Colorectal	16q22.1	rs9929218	16	68820946	G	0.706	0.0618754	7.3e-06		29917119
Colorectal	16q23.2	rs9930005	16	80043258	C	0.4303	0.0487902	2.1e-08		29917119
Colorectal	16q24.1	rs2696839	16	86340448	G	0.505	0.0618754	2e-08		29917119
Colorectal	17p12	rs1078643	17	10707241	A	0.7636	0.076961	6.6e-12		29917119
Colorectal	17p13.3	rs12603526	17	800593	C	0.011	0.105361	0.0247		29917119
Colorectal	17q24.3	rs983318	17	70413253	A	0.2526	0.0582689	5.6e-09		29917119
Colorectal	17q25.3	rs75954926	17	81061048	G	0.6568	0.0861777	3e-18		29917119
Colorectal	18q21.1	rs7229639	18	46450976	A	0.099	0.076961	6.92e-05		29917119
Colorectal	18q21.1	rs4939827	18	46453463	T	0.532	0.131028	3.41e-30		29917119
Colorectal	19p13.11	rs34797592	19	16417198	T	0.1182	0.0861777	4.2e-10		29917119
Colorectal	19q13.11	rs10411210	19	33532300	C	0.903	0.0943107	3.44e-07		29917119
Colorectal	19q13.2	rs1800469	19	41860296	G	0.688	0.0304592	0.00959		29917119
Colorectal	19q13.43	rs73068325	19	59079096	T	0.1826	0.0676586	4.2e-08		29917119
Colorectal	20p12.3	rs961253	20	6404281	A	0.361	0.076961	5.79e-11		29917119
Colorectal	20p12.3	rs4813802	20	6699595	G	0.318	0.0725707	1.24e-09		29917119
Colorectal	20p12.3	rs2423279	20	7812350	C	0.271	0.0618754	1.57e-05		29917119
Colorectal	20p12.3	rs28488	20	6762221	T	0.6388	0.0582689	2.6e-11		29917119
Colorectal	20p12.3	rs994308	20	6603622	C	0.5939	0.076961	4.8e-18		29917119
Colorectal	20q11.22	rs2295444	20	33173883	C	0.505	0.0725707	3.3e-09		29917119
Colorectal	20q13.12	rs6031311	20	42666475	T	0.7591	0.0582689	6.8e-09		29917119
Colorectal	20q13.13	rs6066825	20	47340117	A	0.622	0.0582689	2.29e-06		29917119
Colorectal	20q13.13	rs1810502	20	49057488	C	0.551	0.0725707	1.02e-08		29917119
Colorectal	20q13.33	rs2427308	20	60969451	C	0.766	0.116534	1.75e-13		29917119
Kidney	1p32.3	rs4381241	1	50907438	C	0.44	0.10436	3.1e-10		28598434
Kidney	1q24.1	rs3845536	1	165650787	C	0.64	0.19062	2.3e-08		25826619
Kidney	2p21	rs7579899	2	46537604	A	0.41	0.139762	5.3e-15		21131975
Kidney	2p21	rs12617313	2	46559776	T	0.454	0.24686	1.72e-09		22113997
Kidney	2q22.3	rs12105918	2	145208193	C	0.06	0.223144	3.9e-09		23184150
Kidney	3p22.1	rs67311347	3	40533243	G	0.69	0.105361	2.5e-08		28598434
Kidney	3q26.2	rs10936602	3	169536637	T	0.73	0.105361	8.8e-09		28598434
Kidney	8p21.3	rs2241261	8	22876739	T	0.51	0.0953102	5.8e-09		28598434
Kidney	8q24.21	rs6470588	8	128889371	C	0.44	0.122218	2.8e-12		24220699
Kidney	10q24.33	rs11813268	10	105682296	T	0.16	0.113329	3.9e-08		28598434
Kidney	11q13.3	rs7105934	11	69239741	G	0.93	0.356675	4.9e-22		21131975
Kidney	11q22.3	rs74911261	11	108357137	A	0.02	0.34359	2.1e-10		28598434
Kidney	12p12.1	rs718314	12	26453283	G	0.26	0.165514	2.2e-16		22010048
Kidney	12q24.31	rs4765623	12	125320850	T	0.34	0.131028	2.8e-12		21131975
Kidney	14q24.2	rs4903064	14	73279420	C	0.23	0.19062	2.2e-24		28598434
Lung	1p31.1	rs71658797	1	77967507	A	0.103378	0.127764	3.25e-11		28615365, 28604730
Lung	3q28	rs13080835	3	189357199	G	0.507112	0.0567788	1.25e-06		28615365, 28604731
Lung	5p15.33	rs7705526	5	1285974	A	0.340315	0.117127	1.01e-18		28615365, 28604732
Lung	5p15.33	rs2853677	5	1287194	G	0.423139	0.110664	2.66e-18		28615365, 28604733
Lung	5p15.33	rs465498	5	1325803	A	0.575422	0.140749	2.68e-32		28615365, 28604734
Lung	6p21.33	rs3115672	6	31727897	T	0.09888	0.166124	3.47e-18		28615365, 28604735
Lung	6q27	rs6920364	6	167376466	C	0.456227	0.0677091	1.29e-08		28615365, 28604736
Lung	8p12	rs4236709	8	32410110	G	0.216238	0.0638242	5.88e-06		28615365, 28604737
Lung	8p21.2	rs11780471	8	27344719	G	0.940381	0.141137	1.69e-08		28615365, 28604738
Lung	9p21.3	rs885518	9	21830157	G	0.102799	0.0882251	2.13e-06		28615365, 28604739
Lung	9p21.3	rs62560775	9	22052068	G	0.103628	0.100389	6.02e-07		28615365, 28604740
Lung	11q23.3	rs1056562	11	118125625	T	0.475924	0.0658795	1.92e-08		28615365, 28604741
Lung	12p13.33	rs7953330	12	998819	G	0.687906	0.0872663	6.1e-12		28615365, 28604742
Lung	13q13.1	rs11571833	13	32972626	T	0.010904	0.472187	6.12e-16		28615365, 28604743
Lung	15q21.1	rs66759488	15	47577451	A	0.361826	0.06791	2.83e-08		28615365, 28604744
Lung	15q21.1	rs77468143	15	49376624	T	0.746124	0.0826634	1e-09		28615365, 28604745
Lung	15q25.1	rs55781567	15	78857986	G	0.366674	0.260378	3.1e-103		28615365, 28604746
Lung	15q25.1	rs8042374	15	78908032	A	0.780914	0.232122	2.91e-60		28615365, 28604747
Lung	19q13.2	rs56113850	19	41353107	C	0.559578	0.122793	5.02e-19		28615365, 28604748
Ovary	1p34.3	rs58722170	1	38096421	C	0.2208	0.07007	1.06e-05		28346442
Ovary	1p36.12	rs56318008	1	22470407	T	0.1462	0.06563	0.0004341		28346442
Ovary	2q13	rs2165109	2	111818658	C	0.2519	0.07511	7.718e-07		28346442
Ovary	2q13	rs17041869	2	111896243	G	0.1226	0.05732	0.004185		28346442
Ovary	2q31.1	rs6755777	2	177043226	T	0.3194	0.1063	3.706e-14		28346442
Ovary	3q25.31	rs62274041	3	156435640	A	0.04817	0.3712	4.451e-38		28346442
Ovary	3q28	rs9870207	3	190525516	A	0.6914	0.05224	0.0003196		28346442
Ovary	4q26	rs17329882	4	119949960	C	0.2406	0.0724	2.475e-06		28346442
Ovary	4q32.3	rs13113999	4	167187046	T	0.5157	0.03586	0.0111		28346442
Ovary	5p15.33	rs7705526	5	1285974	A	0.3321	0.08744	6.556e-10		28346442
Ovary	6p22.1	rs6456822	6	28480635	T	0.6909	0.0497	0.0005422		28346442
Ovary	8q21.11	rs150293538	8	77320354	C	0.97844	0.133	0.01293		28346442
Ovary	8q21.13	rs76837345	8	82668818	G	0.0663	0.1446	1.744e-08		28346442
Ovary	8q24.21	rs9886651	8	128817883	G	0.4612	0.05831	1.145e-05		28346442
Ovary	8q24.21	rs1400482	8	129541931	G	0.868	0.1629	6.939e-16		28346442
Ovary	9p22.2	rs10962692	9	16915874	G	0.7996	0.2171	9.226e-36		28346442
Ovary	9q31.1	rs4742903	9	106856793	C	0.5558	0.05487	3.685e-05		28346442
Ovary	9q34.2	rs115478735	9	136149711	T	0.1942	0.1029	8.331e-10	Proxy for 9:136138765	28346442
Ovary	10p12.31	rs12783517	10	21878407	T	0.3093	0.08693	7.805e-10	Proxy for rs144962376	28346442
Ovary	10q24.33	rs7902587	10	105694301	T	0.09757	0.06602	0.00323		28346442
Ovary	11q12.3	rs7937840	11	61893972	T	0.2572	0.04103	0.006811		28346442
Ovary	12q24.31	rs7953249	12	121403724	G	0.4176	0.0603	5.855e-06		28346442
Ovary	15q26.1	rs8037137	15	91506637	T	0.8664	0.09911	4.614e-07		28346442
Ovary	17q11.2	rs62070645	17	29180996	C	0.7294	0.0788	1.34e-07	Proxy for rs143663961	28346442
Ovary	17q12	rs7405776	17	36093022	A	0.3754	0.05083	0.0001868		28346442
Ovary	17q21.31	rs1879586	17	43567337	G	0.1813	0.1257	1.799e-13		28346442
Ovary	17q21.32	rs7207826	17	46500673	C	0.2678	0.1048	7.672e-13		28346442
Ovary	18q11.2	rs8098244	18	21405553	A	0.2754	0.03821	0.0104		28346442
Ovary	19p13.11	rs4808075	19	17390291	C	0.296	0.1224	1.539e-17		28346442
Ovary	19p13.11	rs1469713	19	19528806	G	0.3403	0.0352	0.01083		28346442
Ovary	22q12.1	rs6005807	22	28934313	C	0.8986	0.1144	2.858e-07		28346442
Pancreatic	1p36.33	rs13303010	1	894573	G	0.1	0.231112	8.36e-14		29422604
Pancreatic	1q32.1	rs2816938	1	199985368	A	0.23	0.19062	3.36e-15		29422604
Pancreatic	1q32.1	rs3790844	1	200007432	A	0.76	0.210721	7.62e-16		29422604
Pancreatic	2p13.3	rs1486134	2	67639769	G	0.28	0.122218	4.61e-09		29422604
Pancreatic	3q29	rs9854771	3	189508471	G	0.64	0.105361	4.54e-08		29422604
Pancreatic	5p15.33	rs2736098	5	1294086	C	0.73	0.174353	6.86e-15		29422604
Pancreatic	5p15.33	rs35226131	5	1295373	C	0.97	0.400478	2.19e-08		29422604
Pancreatic	5p15.33	rs401681	5	1322087	T	0.44	0.173953	9.32e-17		29422604
Pancreatic	7p12	rs73328514	7	47488569	A	0.9	0.162519	1.35e-07		29422604
Pancreatic	7p13	rs17688601	7	40866663	C	0.73	0.127833	1.11e-08		29422604
Pancreatic	7q32.3	rs6971499	7	130680521	T	0.84	0.210721	7.41e-14		29422604
Pancreatic	8q21.11	rs2941471	8	76470404	A	0.58	0.116534	6.6e-10		29422604
Pancreatic	8q24.21	rs10094872	8	128719884	T	0.36	0.131028	1.19e-09		29422604
Pancreatic	8q24.21	rs1561927	8	129568078	T	0.73	0.116534	7.09e-08		29422604
Pancreatic	9q34	rs505922	9	136149229	C	0.35	0.239017	7.35e-27		29422604
Pancreatic	13q12.2	rs9581943	13	28493997	A	0.4	0.139762	5.12e-14		29422604
Pancreatic	13q22.1	rs9543325	13	73916628	C	0.38	0.215111	1.22e-22		29422604
Pancreatic	16q23.1	rs7190458	16	75263661	A	0.04	0.307485	1.29e-11		29422604
Pancreatic	17q12	rs4795218	17	36078510	G	0.77	0.127833	1.32e-08		29422604
Pancreatic	17q25.1	rs7214041	17	70401476	T	0.11	0.223144	9.49e-15		29422604
Pancreatic	18q21.32	rs1517037	18	56878274	C	0.81	0.150823	3.28e-08		29422604
Pancreatic	22q12.1	rs16986825	22	29300306	T	0.15	0.139762	1.21e-08		29422604
Prostate	1p22.3	rs12139208	1	88213014	T	0.38	0.0487902	1.7e-08	Proxy for rs56391074	29892016
Prostate	1p36.22	rs636291	1	10556097	A	0.6827	0.0428	5.87e-07		29892016
Prostate	1q21.3	rs17599629	1	150658287	G	0.2181	0.0654	9.871e-12		29892016
Prostate	1q21.3	rs1218582	1	154834183	G	0.4467	0.0457	9.583e-09		29892016
Prostate	1q32.1	rs4245739	1	204518842	A	0.7382	0.0924	3.168e-24		29892016
Prostate	2p11.2	rs10187424	2	85794297	T	0.5738	0.0744	1.265e-20		29892016
Prostate	2p14	rs74702681	2	66652885	T	0.02	0.157004	2e-09		29892016
Prostate	2p15	rs721048	2	63131731	A	0.1822	0.0971	4.999e-22		29892016
Prostate	2p21	rs1465618	2	43553949	T	0.2141	0.0829	2.077e-18		29892016
Prostate	2p24.1	rs9306895	2	20878153	C	0.3635	0.0773	3.068e-21		29892016
Prostate	2p25.1	rs11902236	2	10117868	T	0.269	0.0452	5.205e-07		29892016
Prostate	2p25.1	rs9287719	2	10710730	C	0.4667	0.0663	5.998e-17		29892016
Prostate	2p25.1	rs62106670	2	8597123	T	0.38	0.0487902	7.1e-09		29892016
Prostate	2q13	rs11691517	2	111893096	T	0.74	0.0676586	3.5e-12		29892016
Prostate	2q31.1	rs12621278	2	173311553	A	0.9414	0.2423	2.22e-42		29892016
Prostate	2q31.1	rs34925593	2	174234547	C	0.48	0.0487902	2.8e-08		29892016
Prostate	2q33.1	rs6735656	2	202124502	T	0.73	0.0487902	2.4e-08	Proxy for rs59308963	29892016
Prostate	2q37.3	rs2292884	2	238443226	G	0.2413	0.0606	3.686e-11		29892016
Prostate	2q37.3	rs3771570	2	242382864	T	0.1495	0.0841	1.186e-14		29892016
Prostate	3p12.1	rs2660753	3	87110674	T	0.1028	0.1198	6.297e-21		29892016
Prostate	3q13.12	rs1283104	3	106962521	G	0.38	0.0487902	8.8e-09		29892016
Prostate	3q13.2	rs7611694	3	113275624	A	0.579	0.0831	4.517e-25		29892016
Prostate	3q21.3	rs10934853	3	128038373	A	0.2772	0.0989	1.057e-29		29892016
Prostate	3q23	rs6763931	3	141102833	A	0.4423	0.0428	7.421e-08		29892016
Prostate	3q25.1	rs182314334	3	152004202	T	0.9	0.0861777	4.1e-11		29892016
Prostate	3q26.2	rs10936632	3	170130102	A	0.5074	0.0972	3.36e-34		29892016
Prostate	3q26.2	rs142436749	3	169093100	G	0.01	0.223144	4.7e-09		29892016
Prostate	4q13.3	rs10009409	4	73855253	T	0.3112	0.0555	4.289e-10		29892016
Prostate	4q13.3	rs1894292	4	74349158	G	0.5153	0.062	5.207e-15		29892016
Prostate	4q22.3	rs17021918	4	95562877	C	0.6507	0.0852	1.372e-24		29892016
Prostate	4q24	rs7679673	4	106061534	C	0.5922	0.1201	1.155e-49		29892016
Prostate	5p12	rs2121875	5	44365545	C	0.33	0.0481	1.427e-08		29892016
Prostate	5p15.33	rs2242652	5	1280028	G	0.7943	0.1598	3.46e-52		29892016
Prostate	5q31.1	rs10793821	5	133836209	T	0.57	0.0487902	5.4e-11		29892016
Prostate	5q35.1	rs76551843	5	169172133	A	0.99	0.270027	1.7e-08		29892016
Prostate	5q35.2	rs6869841	5	172939426	T	0.2091	0.0412	1.999e-05		29892016
Prostate	5q35.3	rs4976790	5	177968915	T	0.11	0.076961	6.7e-09		29892016
Prostate	6p21.1	rs4711748	6	43694598	T	0.23	0.0487902	3.4e-08		29892016
Prostate	6p21.31	rs9469899	6	34793124	A	0.36	0.0487902	5.3e-09		29892016
Prostate	6p21.32	rs3096702	6	32192331	A	0.3771	0.0559	9.548e-12		29892016
Prostate	6p21.32	rs3129859	6	32400939	G	0.6698	0.0602	1.302e-12		29892016
Prostate	6p21.32	rs9296068	6	32988695	T	0.65	0.0487902	1.3e-08		29892016
Prostate	6p21.33	rs130067	6	31118511	G	0.2021	0.0512	1.6e-07		29892016
Prostate	6p21.33	rs12665339	6	30601232	G	0.17	0.0582689	5.6e-09		29892016
Prostate	6p24.2	rs4713266	6	11219030	C	0.5168	0.0514	9.523e-11		29892016
Prostate	6q21	rs2273669	6	109285189	G	0.1462	0.0694	3.249e-10		29892016
Prostate	6q25.2	rs1933488	6	153441079	A	0.5788	0.076	3.984e-21		29892016
Prostate	6q25.3	rs9364554	6	160833664	T	0.2826	0.1037	4.577e-33		29892016
Prostate	7p14.1	rs17621345	7	40875192	A	0.74	0.0676586	6.7e-14		29892016
Prostate	7p15.2	rs10486567	7	27976563	G	0.7627	0.1335	2.037e-45		29892016
Prostate	7p15.2	rs56232506	7	47437244	A	0.4507	0.054	1.279e-11		29892016
Prostate	7p15.3	rs12155172	7	20994491	A	0.2198	0.0925	9.12e-23		29892016
Prostate	7p21.1	rs11452686	7	20414110	T	0.56	0.0487902	7.8e-09		29892016
Prostate	7p22.3	rs527510716	7	1944537	C	0.24	0.0582689	4.9e-08		29892016
Prostate	7q21.3	rs6465657	7	97816327	C	0.4635	0.1005	6.965e-37		29892016
Prostate	8p21.2	rs2928679	8	23438975	A	0.4373	0.0534	1.856e-11		29892016
Prostate	8p21.2	rs11135910	8	25892142	T	0.1529	0.0782	9.194e-13		29892016
Prostate	8q24.21	rs12543663	8	127924659	C	0.2945	0.1114	2.572e-38		29892016
Prostate	8q24.21	rs10086908	8	128011937	T	0.6965	0.1255	1.812e-47		29892016
Prostate	8q24.21	rs183373024	8	128104117	G	0.0069	1.068	3.7e-160		29892016
Prostate	8q24.21	rs16901979	8	128124916	A	0.0319	0.445	1.42e-105		29892016
Prostate	8q24.21	rs620861	8	128335673	G	0.6308	0.1386	4.938e-63		29892016
Prostate	8q24.21	rs6983267	8	128413305	G	0.5108	0.2004	2.81e-141		29892016
Prostate	8q24.21	rs1447295	8	128485038	A	0.1074	0.345	1.17e-179		29892016
Prostate	9p13.3	rs10122495	9	34049779	T	0.31	0.0487902	1.3e-08		29892016
Prostate	9p21.3	rs17694493	9	22041998	G	0.1359	0.0726	2.256e-10		29892016
Prostate	9p22.1	rs1048169	9	19055965	C	0.38	0.0582689	6.5e-14		29892016
Prostate	9q33.2	rs1571801	9	124427373	T	0.2684	0.0258	0.003782		29892016
Prostate	9q34.11	rs1182	9	132576060	A	0.22	0.0582689	1.1e-09		29892016
Prostate	10p15.3	rs141536087	10	854691	GCGCA	0.15	0.076961	9e-13		29892016
Prostate	10q11.21	rs76934034	10	46082985	T	0.9174	0.1151	2.048e-14		29892016
Prostate	10q11.23	rs10993994	10	51549496	T	0.383	0.2075	2.29e-147		29892016
Prostate	10q23.31	rs1935581	10	90195149	C	0.63	0.0487902	6.5e-09		29892016
Prostate	10q24.32	rs3850699	10	104414221	A	0.6999	0.0704	6.015e-16		29892016
Prostate	10q25.2	rs7094871	10	114712154	G	0.54	0.0392207	4.8e-08		29892016
Prostate	10q26.13	rs4962416	10	126696872	C	0.2668	0.0593	2.392e-11		29892016
Prostate	11p15.4	rs61890184	11	7547587	A	0.12	0.0676586	6.6e-09		29892016
Prostate	11p15.5	rs7127900	11	2233574	A	0.1985	0.1704	4.939e-68		29892016
Prostate	11p15.5	rs1881502	11	1507512	T	0.19	0.0582689	7.4e-09		29892016
Prostate	11q12.3	rs2277283	11	61908440	C	0.31	0.0582689	3e-10		29892016
Prostate	11q13.2	rs12785905	11	66951965	C	0.05	0.113329	7.8e-09		29892016
Prostate	11q13.3	rs7931342	11	68994497	G	0.5039	0.1565	9.739e-87		29892016
Prostate	11q13.5	rs3753051	11	76257215	T	0.68	0.0582689	7.4e-13	Proxy for rs11290954	29892016
Prostate	11q22.2	rs11568818	11	102401661	T	0.5499	0.0742	1.674e-19		29892016
Prostate	11q22.3	rs1800057	11	108143456	G	0.02	0.14842	8.1e-09		29892016
Prostate	11q23.2	rs11214775	11	113807181	G	0.7085	0.071	3.928e-15		29892016
Prostate	11q24.2	rs138466039	11	125054793	T	0.01	0.277632	2e-11		29892016
Prostate	11q25	rs878987	11	134266372	G	0.15	0.0676586	4.8e-08		29892016
Prostate	12p13.1	rs2066827	12	12871099	T	0.76	0.0582689	2.3e-09		29892016
Prostate	12p13.1	rs10845938	12	14416918	G	0.55	0.0582689	9.8e-13		29892016
Prostate	12q13.11	rs80130819	12	48419618	A	0.9084	0.0957	1.891e-11		29892016
Prostate	12q13.12	rs10875943	12	49676010	C	0.287	0.0688	2.348e-15		29892016
Prostate	12q13.13	rs902774	12	53273904	A	0.1526	0.1258	1.697e-31		29892016
Prostate	12q14.2	rs7968403	12	65012824	T	0.64	0.0582689	3.4e-12		29892016
Prostate	12q21.33	rs5799921	12	90160530	GA	0.68	0.0582689	7e-12		29892016
Prostate	12q24.21	rs1270884	12	114685571	A	0.4823	0.0697	1.221e-18		29892016
Prostate	12q24.33	rs7295014	12	133067989	G	0.35	0.0487902	9.5e-10		29892016
Prostate	14q11.2	rs1004030	14	23305649	T	0.58	0.0487902	1.5e-08		29892016
Prostate	14q13.3	rs11629412	14	37138294	C	0.58	0.0582689	2.3e-12		29892016
Prostate	14q22.1	rs8008270	14	53372330	C	0.8139	0.0832	6.373e-16		29892016
Prostate	14q24.1	rs7141529	14	69126744	C	0.4987	0.0505	1.622e-10		29892016
Prostate	14q24.2	rs8014671	14	71092256	G	0.5804	0.0466	1.669e-08		29892016
Prostate	15q15.1	rs4924487	15	40922915	C	0.81	0.0582689	1.3e-08		29892016
Prostate	15q21.3	rs33984059	15	56385868	A	0.98	0.173953	1.1e-08		29892016
Prostate	15q22.31	rs111572611	15	66755923	T	0.29	0.0582689	3.5e-10	Proxy for rs112293876, r2=0.851	29892016
Prostate	16q21	rs11863709	16	57654576	C	0.96	0.14842	1.8e-11		29892016
Prostate	17p13.1	rs28441558	17	7803118	C	0.05	0.14842	1e-16		29892016
Prostate	17p13.3	rs684232	17	618965	C	0.3534	0.0832	4.342e-24		29892016
Prostate	17q11.2	rs142444269	17	30098749	C	0.78	0.0676586	3.2e-10		29892016
Prostate	17q12	rs11649743	17	36074979	G	0.8055	0.1216	8.96e-33		29892016
Prostate	17q12	rs4430796	17	36098040	A	0.5253	0.1973	1.26e-132		29892016
Prostate	17q21.32	rs138213197	17	46805705	T	0.0022	1.3475	9.169e-63		29892016
Prostate	17q21.32	rs11650494	17	47345186	A	0.0779	0.0992	9.117e-12		29892016
Prostate	17q22	rs2680708	17	56456120	G	0.61	0.0487902	1.6e-08		29892016
Prostate	17q24.3	rs1859962	17	69108753	G	0.4813	0.1606	1.13e-91		29892016
Prostate	18q21.2	rs8093601	18	51772473	C	0.44	0.0487902	2.3e-08		29892016
Prostate	18q21.2	rs28607662	18	53230859	C	0.1	0.076961	2.8e-08		29892016
Prostate	18q21.32	rs12956892	18	56746315	T	0.3	0.0487902	7.7e-09		29892016
Prostate	18q21.33	rs533722308	18	60961193	CT	0.42	0.0487902	1.2e-08		29892016
Prostate	18q22.3	rs10460109	18	73036165	T	0.42	0.0487902	3.5e-08		29892016
Prostate	18q23	rs7241993	18	76773973	C	0.6949	0.0761	2.289e-18		29892016
Prostate	19p13.11	rs11666569	19	17214073	C	0.71	0.0487902	8.2e-09		29892016
Prostate	19q12	rs118005503	19	32167803	G	0.91	0.0861777	7.3e-09		29892016
Prostate	19q13.2	rs8102476	19	38735613	C	0.5393	0.0902	8.827e-30		29892016
Prostate	19q13.2	rs11672691	19	41985587	G	0.7368	0.0916	1.674e-23		29892016
Prostate	19q13.2	rs61088131	19	42700947	T	0.82	0.0582689	8.8e-09		29892016
Prostate	19q13.33	rs2735839	19	51364623	G	0.8527	0.1666	3.343e-47		29892016
Prostate	20q11.21	rs11480453	20	31347512	C	0.6	0.0487902	3.2e-08		29892016
Prostate	20q13.2	rs6091758	20	52455205	G	0.47	0.0676586	6.4e-18		29892016
Prostate	20q13.33	rs2427345	20	61015611	C	0.6206	0.0452	3.288e-08		29892016
Prostate	20q13.33	rs6062509	20	62362563	T	0.6983	0.0775	3.097e-18		29892016
Prostate	22q12.1	rs9625483	22	28888939	A	0.03	0.131028	2.4e-08		29892016
Prostate	22q13.1	rs58133635	22	40471188	T	0.1972	0.0681	4.817e-12		29892016
Prostate	22q13.2	rs5759167	22	43500212	G	0.5021	0.1423	5.546e-71		29892016

## Sheet: Table S2
Table S2. Hazard ratios (95%CI) of cancers by quintile of PRS for all study participants, UK Biobank.a
Cancer site	Q1(low)	Q2	Q3	Q4	Q5	p for trend
Prostate
No. of cases	339	555	790	1060	1686
HR (95% CI)	0.39 (0.35, 0.45)	0.70 (0.63, 0.78)	1.00 (Reference)	1.32 (1.20, 1.44)	2.22 (2.04, 2.41)	<0.001
FH_adjusted HR (95% CI)	0.40 (0.35, 0.45)	0.71 (0.63, 0.79)	1.00 (Reference)	1.31 (1.19, 1.44)	2.19 (2.02, 2.39)	<0.001
Breast
No. of cases	413	639	774	996	1518
HR (95% CI)	0.53 (0.47, 0.60)	0.83 (0.74, 0.92)	1.00 (Reference)	1.29 (1.18, 1.42)	2.00 (1.83, 2.18)	<0.001
FH_adjusted HR (95% CI)	0.54 (0.47, 0.60)	0.83 (0.74, 0.92)	1.00 (Reference)	1.29 (1.17, 1.41)	1.97 (1.80, 2.14)	<0.001
Colorectum
No. of cases	257	399	460	554	788
HR (95% CI)	0.56 (0.48, 0.65)	0.87 (0.76, 0.99)	1.00 (Reference)	1.20 (1.06, 1.36)	1.71 (1.53, 1.92)	<0.001
FH_adjusted HR (95% CI)	0.56 (0.48, 0.65)	0.87 (0.76, 0.99)	1.00 (Reference)	1.20 (1.06, 1.36)	1.71 (1.52, 1.91)	<0.001
Lung
No. of cases	221	266	300	342	379
HR (95% CI)	0.73 (0.62, 0.87)	0.88 (0.75, 1.04)	1.00 (Reference)	1.13 (0.97, 1.32)	1.26 (1.08, 1.46)	<0.001
FH_adjusted HR (95% CI)	0.74 (0.62, 0.88)	0.89 (0.75, 1.05)	1.00 (Reference)	1.12 (0.96, 1.31)	1.24 (1.07, 1.44)	<0.001
Pancreas
No. of cases	42	60	71	119	140
HR (95% CI)	0.59 (0.40, 0.86)	0.84 (0.60, 1.19)	1.00 (Reference)	1.67 (1.25, 2.25)	1.99 (1.49, 2.65)	<0.001
Kidney
No. of cases	76	100	99	122	148
HR (95% CI)	0.77 (0.57, 1.04)	1.01 (0.77, 1.33)	1.00 (Reference)	1.24 (0.95, 1.61)	1.50 (1.16, 1.94)	<0.001
Bladder
No. of cases	62	89	99	126	137
HR (95% CI)	0.63 (0.46, 0.86)	0.89 (0.67, 1.19)	1.00 (Reference)	1.28 (0.98, 1.66)	1.39 (1.07, 1.80)	<0.001
Ovary
No. of cases	60	55	62	73	108
HR (95% CI)	0.97 (0.68, 1.38)	0.89 (0.62, 1.28)	1.00 (Reference)	1.18 (0.84, 1.65)	1.75 (1.28, 2.39)	<0.001
a. Cut-off points for quintiles were based on the distribution of all study participants. Hazard ratios (HR) were estimated using Cox regression and adjusted for age, birth cohort, genotyping array, top 10 PCs for ancestry, and sex (for non-sex specific cancer only). FH_adjusted HR were adjusted for family history in addition.
